# Supplementary material for: Evaluation of Immune Dysregulation in an Austrian Patient Cohort Suffering from Myalgic Encephalomyelitis/Chronic Fatigue Syndrome
Source: MDPI journal article supplement (doi:10.3390/biom11091359), 2021-09-14
Supplement: s1 [file s1]

## Supplementary information

**Supplementary table S1.** Norm values used for laboratory diagnosis.

| Immune Parameter        | Reference Value         |
|-------------------------|-------------------------|
| CD4+ T cells            | 500-1500 cells/ $\mu$ l |
| CD8+ T cells            | 250-1000 cells/ $\mu$ l |
| CD8-CD57+ NK cells      | 30-180 cells/ $\mu$ l   |
| CD3+16+56+ NKT cells    | 20-220 cells/ $\mu$ l   |
| CD3-CD16+CD56+ NK cells | 90-600 cells/ $\mu$ l   |
| IgG                     | 7-16 g/l                |
| IgA                     | 0.7-2.3 g/l             |
| IgM                     | 0.4-2.3 g/l             |
| IgG1                    | 2.8-8.0g/l              |
| IgG2                    | 1.15-5.70g/l            |
| IgG3                    | 0.24-1.25g/l            |
| IgG4                    | 0.052-1.25g/l           |
| MBL                     | <300ng/ml               |
| C3c                     | 0.9-1.8 g/l             |
| C4                      | 0.1-0.4 g/l             |

**Supplementary table S2.** Number of ME/CFS patients with reduced humoral immune parameters

| Parameter                  | No. of patients (95%CI) (n= 262) |
|----------------------------|----------------------------------|
| <b>reduced IgG titers</b>  | <b>17 (10-27)</b>                |
| <b>reduced IgA titers</b>  | <b>17 (10-27)</b>                |
| <b>reduced IgM titers</b>  | <b>13 (7-22)</b>                 |
| reduced IgG1 titers        | 8 (3-16)                         |
| reduced IgG2 titers        | 4 (1-10)                         |
| <b>reduced IgG3 titers</b> | <b>21 (13-31)</b>                |
| <b>reduced IgG4 titers</b> | <b>13 (7-22)</b>                 |
| <b>reduced MBL levels</b>  | <b>84 (69-100)</b>               |
| <b>reduced C3c levels</b>  | <b>41 (30-54)</b>                |
| reduced C4 levels          | 6 (2-13)                         |

**Supplementary table S3.** Differences of reduced immune parameters in male versus female ME/CFS patients

| parameter                  | male (n= 83)    | female (n=179)  | p-value     |
|----------------------------|-----------------|-----------------|-------------|
| reduced IgG titers         | 5 (6.0 %)       | 12 (6.7%)       | 1           |
| reduced IgA titers         | 3 (3.6%)        | 14 (7.8%)       | 0.28        |
| <b>reduced IgM titers</b>  | <b>8 (9.6%)</b> | <b>5 (2.8%)</b> | <b>0.02</b> |
| reduced IgG1 titers        | 1 (1.2%)        | 7 (3.9%)        | 0.44        |
| <b>reduced IgG2 titers</b> | <b>4 (4.8%)</b> | <b>0</b>        | <b>0.01</b> |
| reduced IgG3 titers        | 10 (12.0%)      | 11 (6.1%)       | 0.14        |
| reduced IgG4 titers        | 2 (2.4%)        | 11 (6.1%)       | 0.24        |
| reduced MBL levels         | 30 (36.1%)      | 54 (30.2%)      | 0.39        |
| reduced C3c levels         | 10 (12.0%)      | 31 (17.3%)      | 0.36        |

|                   |            |            |      |
|-------------------|------------|------------|------|
| reduced C4 levels | 1 (1.2%)   | 5 (2.8%)   | 0.67 |
| no immune changes | 35 (42.2%) | 76 (42.5%) | 1    |

For each parameter, frequencies were statistically compared by a Fisher exact test.

**Supplementary table S4.** Differences of reduced immune parameters in two age groups of ME/CFS patients

| parameter           | 18-40 years (n= 131) | 41-80 years (n= 131) | p-value |
|---------------------|----------------------|----------------------|---------|
| reduced IgG titers  | 6 (4.6%)             | 11 (8.4%)            | 0.32    |
| reduced IgA titers  | 5 (3.8%)             | 12 (9.2%)            | 0.13    |
| reduced IgM titers  | 6 (4.6%)             | 7 (5.3%)             | 1       |
| reduced IgG1 titers | 2 (1.5%)             | 6 (4.6%)             | 0.28    |
| reduced IgG2 titers | 4 (3.1%)             | 0                    | 0.12    |
| reduced IgG3 titers | 8 (6.1%)             | 13 (9.9%)            | 0.36    |
| reduced IgG4 titers | 9 (6.9%)             | 4 (3.1%)             | 0.25    |
| reduced MBL levels  | 38 (29%)             | 46 (35.1%)           | 0.35    |
| reduced C3c levels  | 26 (19.8%)           | 15 (11.5%)           | 0.09    |
| reduced C4 levels   | 3 (2.3%)             | 3 (2.3%)             | 1       |
| no immune changes   | 61 (46.6%)           | 50 (38.2%)           | 0.21    |

For each parameter, frequencies were statistically compared by a Fisher exact test.

**Supplementary table S5.** Immunodeficiencies in male versus female ME/CFS patients

| Parameter                          | Male (n= 53) | Female (n=114) | p-value |
|------------------------------------|--------------|----------------|---------|
| unclassified antibody deficiency   | 14 (26.4%)   | 32 (28.1%)     | 0.85    |
| selective IgA deficiency           | 0            | 7 (6.1%)       | 0.1     |
| IgA with IgG subclass deficiency   | 1 (1.9%)     | 4 (3.5%)       | 1       |
| isolated IgG1 subclass deficiency  | 0            | 2 (1.8%)       | 1       |
| isolated IgG2 subclass deficiency  | 1 (1.9%)     | 0              | 0.32    |
| isolated IgG3 subclass deficiency  | 6 (11.3%)    | 9 (7.9%)       | 0.56    |
| isolated IgG4 subclass deficiency  | 0            | 7 (6.1%)       | 0.1     |
| selective IgM deficiency           | 3 (5.7%)     | 2 (1.8%)       | 0.33    |
| MBL deficiency                     | 7 (13.2%)    | 11 (9.6%)      | 0.59    |
| complement component C3 deficiency | 0            | 5 (4.4%)       | 0.18    |
| complement component C4 deficiency | 0            | 1 (0.9%)       | 1       |
| no immune changes                  | 22 (41.5%)   | 39             | 0.39    |

For each parameter, frequencies were statistically compared by a Fisher exact test.

**Supplementary table S6.** Immunodeficiencies in different age groups of ME/CFS patients

| Parameter                                | 18-40 years (n=86) | 41-80 years (n=81) | p-value     |
|------------------------------------------|--------------------|--------------------|-------------|
| unclassified antibody deficiency         | 23 (26.7%)         | 23 (28.4%)         | 0.86        |
| selective IgA deficiency                 | 2 (2.3%)           | 5 (6.2%)           | 0.27        |
| IgA with IgG subclass deficiency         | 2 (2.3%)           | 3 (3.7%)           | 0.67        |
| isolated IgG1 subclass deficiency        | 2 (2.3%)           | 0                  | 0.5         |
| isolated IgG2 subclass deficiency        | 1 (1.2%)           | 0                  | 1           |
| isolated IgG3 subclass deficiency        | 6 (6.9%)           | 9 (11.1%)          | 0.42        |
| <b>isolated IgG4 subclass deficiency</b> | <b>7 (8.1%)</b>    | <b>0</b>           | <b>0.01</b> |
| selective IgM deficiency                 | 3 (3.5%)           | 2 (2.5%)           | 1           |
| MBL deficiency                           | 9 (10.5%)          | 9 (11.1%)          | 1           |
| complement component C3 deficiency       | 2 (2.3%)           | 3 (3.7%)           | 0.67        |
| complement component C4 deficiency       | 1 (1.2%)           | 0                  | 1           |
| No immune changes                        | 30 (34.9%)         | 31 (38.3%)         | 0.75        |

For each parameter, frequencies were statistically compared by a Fisher exact test.
